# Supplementary material
Source: PubMed Central journal article supplement (PMC4995886)

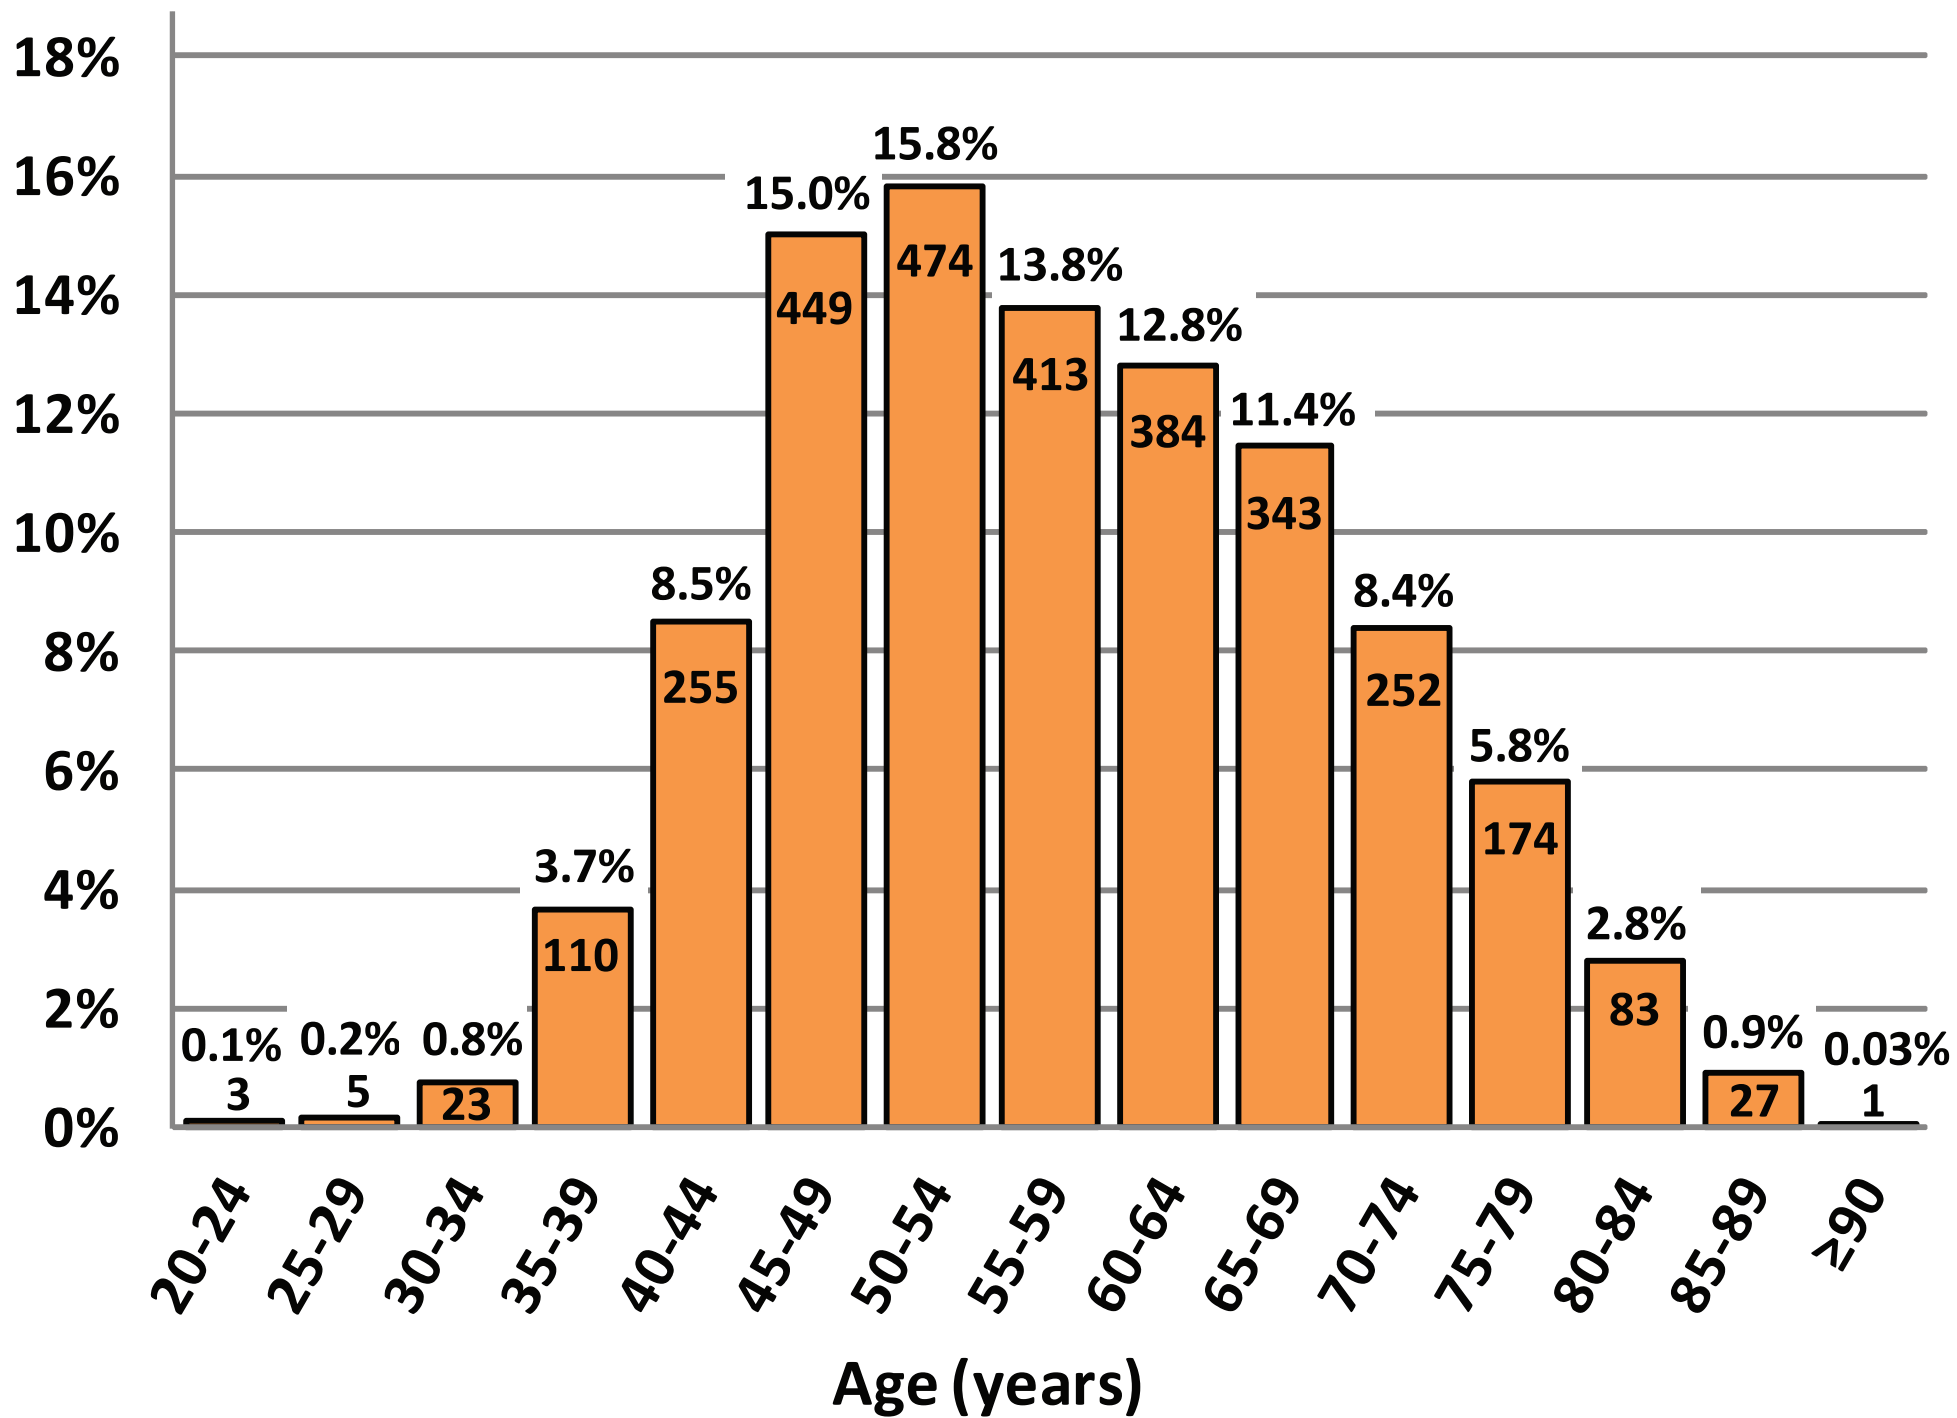

Supplement: NIHMS810759-supplement-Supplemental_File_1.pdf [file NIHMS810759-supplement-Supplemental_File_1.pdf]

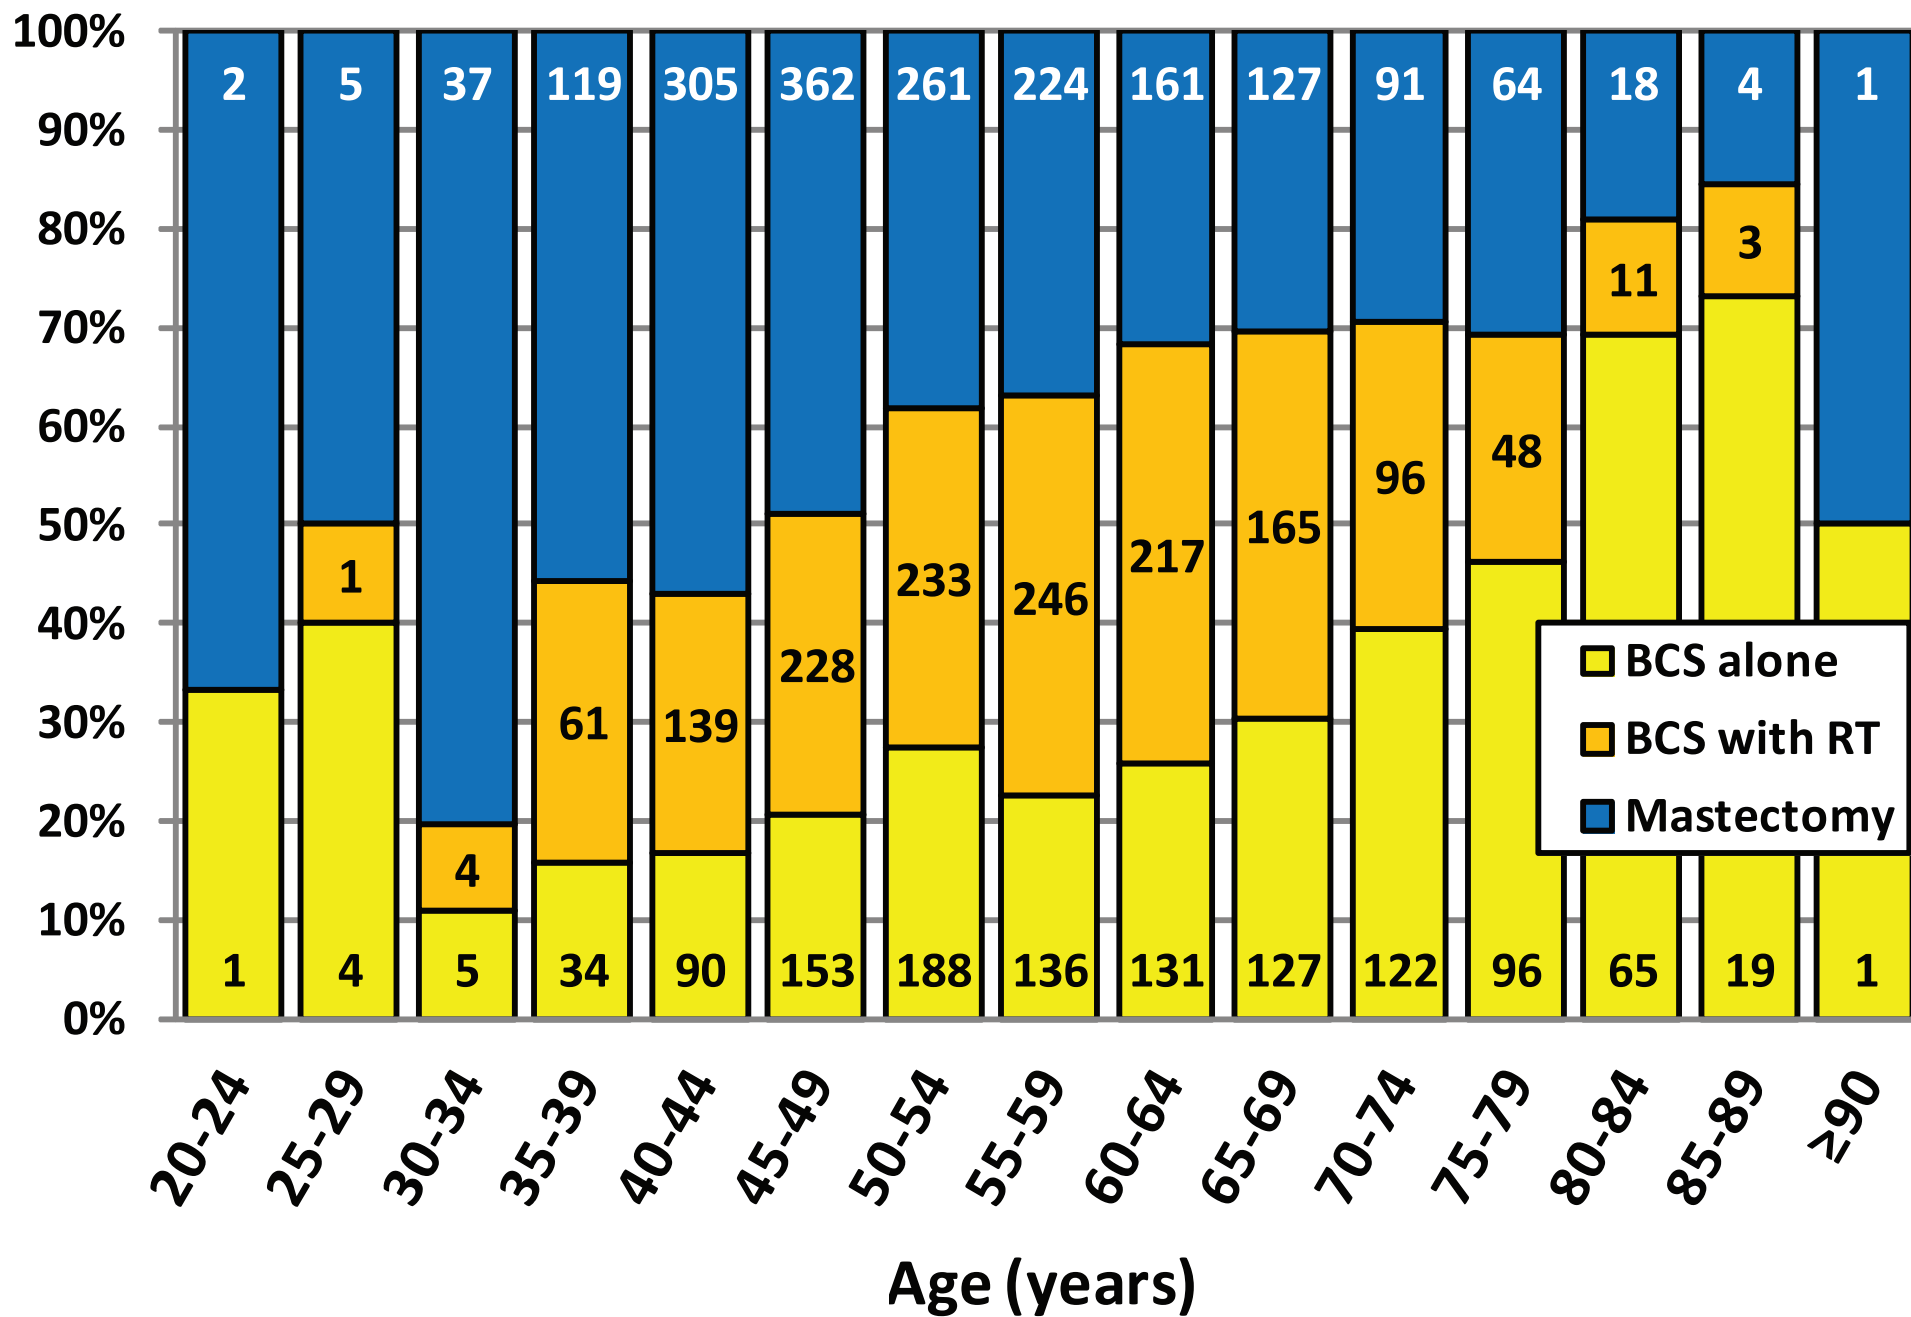

Supplement: NIHMS810759-supplement-Supplemental_File_2.pdf [file NIHMS810759-supplement-Supplemental_File_2.pdf]
